# Supplementary material
Source: publisher figshare collection journal article supplement (https://gsapubs.figshare.com/ndownloader/files/35910869)
Supplement: Supplementary file 1 [file 35910869]

## Sheet: Storm_Event
Table S1. Channel parameters and sediment flux during August 17th 2019 storm conditions
Site Number	Lat	Long	Distance from Apex	Drainage Area	Slope	Bedforms	Storm Hydraulic Radius	Storm Depth	Storm Width	Storm Mean velocity	Froude	Q storm	Runoff storm	Bedload?	D50, all	D84, all	tau*	tau*cr	Phi (Lamb)	% Sand	tau_c* (W&C)	Phi (W&C)	D50, > 2 mm	D84, > 2 mm	tau*_r (Schneider)	Phi (Schneider)	W* (Schneider)	Flux (Schneider)
			km	km2	--		m	m	m	m/s		m3/s	mm/hr		mm	mm				%		--	mm	mm				m3/hr
0	135°26.4434645'W	67°58.0987027'N	-559	2.6	0.074	CAS / SP	0.064	0.1	1.4	0.9	0.908674	0.09	0.124615	yes	17.3	74.4	0.165913	0.0782347	2.12072	11	0.022662	7.3212	24	78	0.152336	0.785078	4.06559e-05	0.000126772
1	135°26.3592392'W	67°58.1075133'N	-498	2.62	0.076	SP	0.062	0.1	1.03	0.9	0.908674	0.144	0.197863	yes	13.2	54.5	0.216345	0.078758	2.74696	14	0.0219122	9.8733	19	64	0.154381	1.1	0.00927795	0.0211227
2	135°26.1399945'W	67°58.1087276'N	-343	3.1	0.08	CAS / SP	0.07	0.13	1.09	1.1	0.974062	0.132	0.15329	no	17.7	61.6	0.191748	0.0797744	2.40363	8	0.0240284	7.98004	19	64	0.158392	1.12776	0.013859	0.0432606
3	135°25.8676935'W	67°58.1183050'N	-146	3.17	0.12	CAS	0.018	0.04	0.5	1.3	2.07529	0.0117	0.0132871	no	7.3	32	0.179328	0.0882849	2.03124	4	0.0277399	6.4646	8	32	0.19399	0.843531	0.000129199	4.43162e-05
4	135°25.6754641'W	67°58.1169786'N	0	3.18	0.12	PL	0.017	0.03	0.05	1.1	2.02767	0.011	0.0124528	no	4.6	32	0.268775	0.0882849	3.0444	30	0.0210372	12.7762	8	64	0.19399	0.796668	5.14753e-05	1.62057e-06
5	135°25.4651462'W	67°58.1171658'N	152	3.24	0.1	AB	0.018	0.03	0.54	1.1	2.02767	0.077	0.0855556	no	10.8	79.6	0.10101	0.0843512	1.19749	24	0.0211234	4.78189	19	98	0.177088	0.324225	2.66481e-11	7.50968e-12
6	135°24.9231261'W	67°58.0685011'N	560	3.28	0.08	Stepped AB	0.018	0.025	0.59	0.9	1.81735	0.0135	0.0148171	no	1.7	32	0.513369	0.0797744	6.43526	55	0.0210003	24.4459	23	58	0.158392	0.239562	2.04012e-13	4.49473e-14
7	135°24.7749773'W	67°58.0496945'N	670	3.28	0.06	AB	0.025	0.04	0.72	0.6	0.957826	0.0096	0.0105366	no	5.6	32	0.162338	0.0742385	2.18671	33	0.0210204	7.72286	12.5	56	0.137171	0.530193	7.31833e-08	2.09187e-08
8	135°24.4793505'W	67°58.0730128'N	893	3.29	0.08	AB	0.029	0.04	0.6	0.6	0.957826	0.0162	0.0177264	yes	2.4	22.5	0.585859	0.0797744	7.34394	49	0.0210008	27.8969	13	39	0.158392	0.682854	4.30235e-06	1.97125e-06
9	135°23.9768739'W	67°58.1192004'N	1257	3.38	0.055	AB	0.017	0.04	0.4	1.3	2.07529	0.039	0.0415385	no	8	56.4	0.0708333	0.072641	0.975115	30	0.0210372	3.36705	25	77	0.131332	0.172591	1.03998e-15	8.12746e-17
10	135°23'47"W	67°58'7"N	1393	3.38	0.048	PL	0.026	0.04	0.63	1.3	2.07529	0.0325	0.0346154	no	6.5	36.7	0.116364	0.0702104	1.65736	27	0.0210677	5.52331	12	45	0.12269	0.513737	4.4051e-08	8.36126e-09
11	135°23.6351980'W	67°58.1209968'N	1498	3.43	0.09	AB	0.012	0.025	0.72	0.9	1.81735	0.0045	0.00472303	no	6.8	48.2	0.0962567	0.0821584	1.1716	39	0.0210061	4.58231	16	72	0.168	0.243506	2.65369e-13	4.63416e-14
12	135°23.4369187'W	67°58.1440967'N	1644	3.44	0.05	AB	0.025	0.04	0.57	0.6	0.957826	0.018	0.0188372	no	5.6	32	0.135281	0.0709306	1.90724	43	0.0210028	6.44112	14	54	0.12522	0.432141	2.72015e-09	4.68258e-10
13	135°23.0401303'W	67°58.1580082'N	1925	3.56	0.04	AB	0.03	0.045	0.54	0.5	0.752539	0.025	0.0252809	no	1.4	7.3	0.519481	0.067082	7.74396	50	0.0210007	24.7364	9.8	32	0.112	0.662603	2.64976e-06	4.06467e-07
14	135°22.9117009'W	67°58.1624956'N	2015	3.56	0.04	AB	0.028	0.055	0.59	0.5	0.680698	0.02	0.0202247	no	2.3	9.1	0.295125	0.067082	4.39947	49	0.0210008	14.053	4.8	11	0.112	1.26263	0.0441016	0.00666478
15	135°22.5745343'W	67°58.1569011'N	2253	3.57	0.035	AB	0.023	0.05	0.58	0.5	0.713922	0.009	0.00907563	no	1.1	3.4	0.443526	0.0648796	6.83614	73	0.021	21.1203	4.4	21	0.104766	1.05837	0.00498527	0.000451299
16	135°22.3034013'W	67°58.1586081'N	2444	3.89	0.015	AB	0.036	0.07	0.43	0.6	0.724049	0.0384	0.0355373	no	3	20.9	0.109091	0.0524945	2.07814	50	0.0210007	5.19464	16	28	0.0685857	0.298233	6.9404e-12	2.55916e-13
17	135°21.9175470'W	67°58.1948470'N	2729	4.04	0.017	AB	0.024	0.05	0.45	0.9	1.28506	0.027	0.0240594	no	0.5	5.6	0.494545	0.0541631	9.13067	61	0.0210001	23.5497	5	16	0.0730151	0.67732	3.77406e-06	9.56456e-08
18	135°21.3674894'W	67°58.2036170'N	3116	4.07	0.02	AB / PL	0.03	0.04	0.66	0.4	0.638551	0.0076	0.00672236	no	1.4	7.3	0.25974	0.056409	4.60459	56	0.0210002	12.3685	6	11	0.079196	0.765267	2.69414e-05	1.78584e-06
19	135°21.0917765'W	67°58.1818858'N	3315	4.2	0.01	AB	0.02	0.055	0.61	0.5	0.680698	0.0125	0.0107143	no	3	6.6	0.040404	0.0474342	0.851792	45	0.0210019	1.92383	6.5	12	0.056	0.333	4.09628e-11	4.82967e-13
